# Supplementary material for: Mechanistic study on the reductive elimination of (aryl)(fluoroaryl)palladium complexes: a key step in regiospecific dehydrogenative cross-coupling
Source: Royal Society of Chemistry journal article supplement (doi:10.1039/d4dt01453g), 2024-01-01
Supplement: d4dt01453g2.pdf [file d4dt01453g2.pdf]

## Mechanistic Study on the Reductive Elimination of (Aryl)(fluoroaryl)palladium Complexes: A Key Step in Regiospecific Dehydrogenative Cross-coupling

Tomoki Iida,<sup>[a]</sup> Ryota Sato,<sup>[a]</sup> Yusuke Yoshigoe,<sup>[b]</sup> Takaki Kanbara\*<sup>[a]</sup> and Junpei Kuwabara\*<sup>[a,c]</sup>

<sup>[a]</sup> *Institute of Pure and Applied Sciences, University of Tsukuba 1-1-1 Tennodai, Tsukuba, Ibaraki 305-8573, Japan. E-mail: kanbara@ims.tsukuba.ac.jp,*

<sup>[b]</sup> *Department of Chemistry, Faculty of Science, Tokyo University of Science, Kagurazaka, Shinjuku, Tokyo 162-8601, Japan*

<sup>[c]</sup> *Tsukuba Research Center for Energy Materials Science (TREMS), Institute of Pure and Applied Sciences, University of Tsukuba 1-1-1 Tennodai, Tsukuba, Ibaraki 305-8573, Japan. E-mail: kuwabara@ims.tsukuba.ac.jp*

## Theoretical calculations

All calculations were carried out with Gaussian 09 Rev. D.01. Program package<sup>1</sup> or Gaussian 16 Rev. B.01 Program package.<sup>2</sup> Geometry optimizations and energy calculations for the ground-state structures and the transition-state structures were carried out with the DFT methods using Becker's three-parameter hybrid functional B3LYP<sup>3</sup>, and SDD (for Pd)<sup>4</sup> as well as the standard 6-31G(d,p) (for the other)<sup>5</sup> basis set. Frequency calculations for the optimized structures were performed at the same level to identify whether the obtained structures are the stable structures (without imaginary frequency) or the transition states (with sole imaginary frequency). The connection of the transition state with the reactant and product was examined by the intrinsic reaction coordinate (IRC)<sup>6</sup> technique. To evaluate precise energies, single-point calculations were performed using the same functional, and SDD (for Pd) as well as the standard 6-311+G(d,p) (for the other) basis sets. Solvation effects were considered by using the self-consistent reaction field (SCRF) method with IEF-PCM solvation model<sup>7</sup> of cyclopentylmethyl ether ( $\epsilon = 4.74$ ). The coordinates of the optimized geometries for the ground and transition states as well as their calculated parameters with atomic units are shown below.

|                                                            |          |         |          |          |          |          |          |
|------------------------------------------------------------|----------|---------|----------|----------|----------|----------|----------|
| <b>Int1-<math>\alpha</math></b>                            |          |         | H        | -2.32521 | 3.02017  | -1.60476 |          |
| Parameters:                                                |          |         | C        | -2.76100 | 2.22971  | 1.62548  |          |
| Zero-point correction = 0.410571                           |          |         | H        | -0.78056 | 4.09082  | 0.81612  |          |
| Thermal correction to Energy = 0.439663                    |          |         | H        | -0.77614 | 4.81145  | -0.79344 |          |
| Thermal correction to Enthalpy = 0.440607                  |          |         | C        | -3.56301 | 1.22218  | -0.40848 |          |
| Thermal correction to Gibbs Free Energy = 0.351806         |          |         | C        | 1.35981  | 0.02651  | 0.06070  |          |
| Sum of electronic and zero-point Energies = -1588.813566   |          |         | C        | 1.48793  | 3.38880  | 0.05750  |          |
| Sum of electronic and thermal Energies = -1588.784475      |          |         | C        | 0.45968  | 2.91703  | -2.06969 |          |
| Sum of electronic and thermal Enthalpies = -1588.783530    |          |         | C        | -1.21524 | -0.85597 | 0.75525  |          |
| Sum of electronic and thermal Free Energies = -1588.872331 |          |         | H        | -0.44727 | 2.59569  | -2.58319 |          |
|                                                            |          |         | H        | 0.74531  | 3.91346  | -2.43865 |          |
| Coordinates:                                               |          |         | H        | 1.24918  | 2.20362  | -2.30496 |          |
| C                                                          | -2.23087 | 3.24125 | -0.53873 | H        | 1.75684  | 4.40804  | -0.25681 |
| H                                                          | -3.02433 | 3.96091 | -0.28810 | H        | 1.35461  | 3.37054  | 1.14074  |
| C                                                          | -0.87020 | 3.85999 | -0.24838 | H        | 2.29944  | 2.70943  | -0.20549 |
| N                                                          | -2.43655 | 1.96551 | 0.20275  | H        | -4.48593 | 1.81892  | -0.37486 |
| N                                                          | 0.24283  | 2.94072 | -0.60446 | H        | -3.32550 | 0.98352  | -1.44629 |
| Pd                                                         | -0.46839 | 0.90322 | 0.09808  | H        | -3.71659 | 0.29070  | 0.13573  |

|   |          |          |          |                                                           |
|---|----------|----------|----------|-----------------------------------------------------------|
| H | -1.95313 | 2.78368  | 2.10502  | Sum of electronic and zero-point Energies = -1588.763413  |
| H | -3.69280 | 2.80802  | 1.70969  | Sum of electronic and thermal Energies= -1588.734272      |
| H | -2.87813 | 1.27712  | 2.14306  | Sum of electronic and thermal Enthalpies= -1588.733328    |
| C | -1.73229 | -1.85845 | -0.13623 | Sum of electronic and thermal Free Energies= -1588.822364 |
| C | -1.31802 | -1.08186 | 2.12078  | Imaginary frequency = 142.7330i                           |
| C | -2.37081 | -3.03420 | 0.39795  |                                                           |
| C | -1.64805 | -1.73828 | -1.55351 | Coordinates:                                              |
| C | -1.94268 | -2.24275 | 2.64707  | C -2.26610 3.32459 -0.44397                               |
| C | -2.46388 | -3.19833 | 1.80621  | H -2.95518 4.12585 -0.12736                               |
| C | -2.89283 | -4.00941 | -0.49713 | C -0.84241 3.88133 -0.46207                               |
| C | -2.16142 | -2.70219 | -2.39466 | N -2.40402 2.13422 0.42060                                |
| C | -2.79524 | -3.85094 | -1.86135 | N 0.15173 2.90288 -0.95706                                |
| H | -0.90427 | -0.36090 | 2.82014  | Pd -0.42796 0.84850 0.04665                               |
| H | -1.14615 | -0.86589 | -1.95959 | H -2.56353 3.03510 -1.45571                               |
| H | -2.00326 | -2.37164 | 3.72528  | C -2.43754 2.50466 1.84707                                |
| H | -2.94470 | -4.08933 | 2.20268  | H -0.54507 4.17036 0.54962                                |
| H | -3.37303 | -4.89147 | -0.07937 | H -0.82661 4.79863 -1.07412                               |
| H | -2.07558 | -2.58565 | -3.47168 | C -3.63027 1.39184 0.08286                                |
| H | -3.19796 | -4.60671 | -2.53014 | C 1.04008 -0.63390 0.20534                                |
| C | 1.96018  | -0.44448 | -1.10214 | C 1.51197 3.32413 -0.57419                                |
| C | 2.13317  | -0.10150 | 1.21113  | C 0.08289 2.76877 -2.42480                                |
| C | 3.40712  | -0.66462 | 1.22774  | C -0.49266 -1.14831 0.74673                               |
| C | 3.23107  | -1.01542 | -1.14137 | H -0.90816 2.43168 -2.73256                               |
| C | 3.96038  | -1.12943 | 0.03792  | H 0.30250 3.72601 -2.92652                                |
| F | 1.66158  | 0.35151  | 2.40457  | H 0.81098 2.02411 -2.75304                                |
| F | 4.11303  | -0.75900 | 2.37019  | H 1.77762 4.29711 -1.01956                                |
| F | 1.31096  | -0.34721 | -2.29660 | H 1.58188 3.40186 0.51267                                 |
| F | 3.76341  | -1.45144 | -2.29843 | H 2.23163 2.57627 -0.91438                                |
| F | 5.18927  | -1.67301 | 0.02726  | H -4.53546 1.99972 0.24855                                |

### TS- $\alpha$

Zero-point correction = 0.407771

Thermal correction to Energy = 0.436912

Thermal correction to Enthalpy = 0.437856

Thermal correction to Gibbs Free Energy = 0.348820

|    |          |          |          |
|----|----------|----------|----------|
| C  | -2.26610 | 3.32459  | -0.44397 |
| H  | -2.95518 | 4.12585  | -0.12736 |
| C  | -0.84241 | 3.88133  | -0.46207 |
| N  | -2.40402 | 2.13422  | 0.42060  |
| N  | 0.15173  | 2.90288  | -0.95706 |
| Pd | -0.42796 | 0.84850  | 0.04665  |
| H  | -2.56353 | 3.03510  | -1.45571 |
| C  | -2.43754 | 2.50466  | 1.84707  |
| H  | -0.54507 | 4.17036  | 0.54962  |
| H  | -0.82661 | 4.79863  | -1.07412 |
| C  | -3.63027 | 1.39184  | 0.08286  |
| C  | 1.04008  | -0.63390 | 0.20534  |
| C  | 1.51197  | 3.32413  | -0.57419 |
| C  | 0.08289  | 2.76877  | -2.42480 |
| C  | -0.49266 | -1.14831 | 0.74673  |
| H  | -0.90816 | 2.43168  | -2.73256 |
| H  | 0.30250  | 3.72601  | -2.92652 |
| H  | 0.81098  | 2.02411  | -2.75304 |
| H  | 1.77762  | 4.29711  | -1.01956 |
| H  | 1.58188  | 3.40186  | 0.51267  |
| H  | 2.23163  | 2.57627  | -0.91438 |
| H  | -4.53546 | 1.99972  | 0.24855  |
| H  | -3.59825 | 1.08126  | -0.96336 |
| H  | -3.69161 | 0.49541  | 0.70337  |
| H  | -1.52682 | 3.03645  | 2.12721  |
| H  | -3.30628 | 3.14447  | 2.07721  |
| H  | -2.49676 | 1.59741  | 2.45214  |
| C  | -1.46911 | -1.86048 | -0.08285 |
| C  | -0.51014 | -1.43833 | 2.12637  |

|   |          |          |          |
|---|----------|----------|----------|
| C | -2.32043 | -2.85462 | 0.51749  |
| C | -1.70162 | -1.55678 | -1.45443 |
| C | -1.35821 | -2.40376 | 2.69301  |
| C | -2.23195 | -3.12449 | 1.90763  |
| C | -3.28682 | -3.52902 | -0.28224 |
| C | -2.66201 | -2.21021 | -2.19871 |
| C | -3.45803 | -3.22029 | -1.61135 |
| H | 0.18857  | -0.93329 | 2.77920  |
| H | -1.10681 | -0.78080 | -1.92060 |
| H | -1.30477 | -2.58712 | 3.76299  |
| H | -2.87754 | -3.88404 | 2.34004  |
| H | -3.90467 | -4.28792 | 0.19155  |
| H | -2.80377 | -1.94829 | -3.24348 |
| H | -4.20474 | -3.74006 | -2.20507 |
| C | 1.67053  | -1.31422 | -0.87299 |
| C | 2.00119  | -0.14311 | 1.14504  |
| C | 3.37003  | -0.30887 | 1.04192  |
| C | 3.04253  | -1.50337 | -0.99540 |
| C | 3.91396  | -1.00869 | -0.03439 |
| F | 1.59657  | 0.58212  | 2.22693  |
| F | 4.19097  | 0.23300  | 1.96016  |
| F | 0.94004  | -1.83742 | -1.88295 |
| F | 3.53319  | -2.16795 | -2.05699 |
| F | 5.23983  | -1.18824 | -0.14034 |

### Int2- $\alpha$

#### Parameters:

Zero-point correction = 0.409038

Thermal correction to Energy = 0.438674

Thermal correction to Enthalpy = 0.439618

Thermal correction to Gibbs Free Energy = 0.348482

Sum of electronic and zero-point Energies = -1588.792702

Sum of electronic and thermal Energies = -1588.763066

Sum of electronic and thermal Enthalpies = -1588.762122

Sum of electronic and thermal Free Energies = -1588.853258

#### Coordinates:

|    |          |          |          |
|----|----------|----------|----------|
| C  | 3.46109  | -2.14228 | 0.61966  |
| H  | 3.95554  | -2.82090 | 1.33603  |
| C  | 2.56557  | -2.96921 | -0.30319 |
| N  | 2.72492  | -1.07486 | 1.32621  |
| N  | 1.96816  | -2.17016 | -1.39238 |
| Pd | 1.2724   | -0.10474 | -0.34906 |
| H  | 4.25536  | -1.66930 | 0.03552  |
| C  | 1.96087  | -1.61825 | 2.46134  |
| H  | 1.7457   | -3.40553 | 0.27477  |
| H  | 3.1537   | -3.81093 | -0.70919 |
| C  | 3.65977  | -0.04861 | 1.81843  |
| C  | -1.94553 | 0.56800  | 0.54737  |
| C  | 0.81826  | -2.88080 | -1.97454 |
| C  | 2.95181  | -1.88544 | -2.45020 |
| C  | -0.79426 | 1.45151  | 0.89034  |
| H  | 3.80160  | -1.33407 | -2.04484 |
| H  | 3.32317  | -2.81323 | -2.91904 |
| H  | 2.48598  | -1.26466 | -3.21834 |
| H  | 1.11099  | -3.85181 | -2.41013 |
| H  | 0.06340  | -3.05397 | -1.20427 |
| H  | 0.37440  | -2.26772 | -2.76234 |
| H  | 4.39148  | -0.46721 | 2.53120  |
| H  | 4.19920  | 0.39230  | 0.97720  |
| H  | 3.09668  | 0.74185  | 2.31900  |
| H  | 1.25020  | -2.37157 | 2.11944  |
| H  | 2.62685  | -2.07511 | 3.21389  |
| H  | 1.39292  | -0.81383 | 2.93164  |
| C  | 0.20809  | 1.79509  | -0.10787 |
| C  | -0.71716 | 1.98102  | 2.16136  |
| C  | 1.14387  | 2.86968  | 0.21339  |
| C  | 0.14999  | 1.31381  | -1.48390 |
| C  | 0.29311  | 2.92076  | 2.50212  |
| C  | 1.18143  | 3.36243  | 1.55242  |

|   |          |          |          |    |          |          |          |
|---|----------|----------|----------|----|----------|----------|----------|
| C | 1.95330  | 3.41324  | -0.79839 | C  | 1.85900  | -3.62534 | -0.65105 |
| C | 0.97725  | 1.93437  | -2.45833 | N  | -0.49169 | -3.13522 | 0.04505  |
| C | 1.86747  | 2.95166  | -2.11518 | N  | 2.32563  | -2.26602 | -0.27687 |
| H | -1.45403 | 1.69563  | 2.90631  | Pd | 0.41019  | -1.08167 | 0.02964  |
| H | -0.73036 | 0.78192  | -1.83709 | H  | 0.93322  | -4.09832 | 1.24100  |
| H | 0.32688  | 3.32015  | 3.51173  | C  | -1.20706 | -3.36513 | -1.23173 |
| H | 1.91217  | 4.12928  | 1.79913  | H  | 1.59008  | -3.60163 | -1.71041 |
| H | 2.64452  | 4.21210  | -0.54174 | H  | 2.67178  | -4.36041 | -0.54124 |
| H | 0.87609  | 1.63274  | -3.49776 | C  | -1.43633 | -3.34997 | 1.16549  |
| H | 2.48582  | 3.40592  | -2.88517 | C  | 1.27176  | 0.74812  | -0.01513 |
| C | -2.93691 | 0.98034  | -0.35050 | C  | 3.18476  | -1.71817 | -1.34871 |
| C | -2.12571 | -0.68897 | 1.13322  | C  | 3.09327  | -2.29375 | 0.98844  |
| C | -3.21068 | -1.50591 | 0.82956  | C  | -1.33001 | -0.12680 | 0.33450  |
| C | -4.03261 | 0.18370  | -0.67189 | H  | 2.47919  | -2.68682 | 1.79955  |
| C | -4.17220 | -1.06604 | -0.07558 | H  | 3.99591  | -2.91562 | 0.88707  |
| F | -1.21449 | -1.16940 | 1.99812  | H  | 3.38416  | -1.27655 | 1.25199  |
| F | -3.33078 | -2.71520 | 1.39692  | H  | 4.06419  | -2.35779 | -1.51754 |
| F | -2.85243 | 2.18778  | -0.93421 | H  | 2.61224  | -1.63960 | -2.27461 |
| F | -4.95911 | 0.61787  | -1.53755 | H  | 3.51971  | -0.72025 | -1.06347 |
| F | -5.22182 | -1.84099 | -0.37261 | H  | -1.81372 | -4.38334 | 1.16676  |

### Int1- $\beta$

#### Parameters:

Zero-point correction = 0.410324

Thermal correction to Energy = 0.439537

Thermal correction to Enthalpy = 0.440481

Thermal correction to Gibbs Free Energy = 0.350725

Sum of electronic and zero-point Energies = -1588.815773

Sum of electronic and thermal Energies = -1588.786560

Sum of electronic and thermal Enthalpies = -1588.785616

Sum of electronic and thermal Free Energies = -1588.875372

#### Coordinates:

|   |         |          |          |   |          |         |          |
|---|---------|----------|----------|---|----------|---------|----------|
| C | 0.66175 | -4.06576 | 0.18283  | F | 3.11765  | 4.50088 | -0.12558 |
| H | 0.36780 | -5.08664 | -0.10513 | C | -1.70414 | 0.28992 | 1.64914  |

|    |          |          |          |   |          |         |          |
|----|----------|----------|----------|---|----------|---------|----------|
| C  | 1.85900  | -3.62534 | -0.65105 | C | 1.80828  | 1.34810 | 1.11859  |
| N  | -0.49169 | -3.13522 | 0.04505  | C | 1.38887  | 1.48615 | -1.18840 |
| N  | 2.32563  | -2.26602 | -0.27687 | C | 1.99779  | 2.73780 | -1.25143 |
| Pd | 0.41019  | -1.08167 | 0.02964  | C | 2.42691  | 2.59689 | 1.11014  |
| H  | 0.93322  | -4.09832 | 1.24100  | C | 2.52133  | 3.29791 | -0.08887 |
| C  | -1.20706 | -3.36513 | -1.23173 | F | 0.90237  | 0.98840 | -2.35666 |
| H  | 1.59008  | -3.60163 | -1.71041 | F | 2.09347  | 3.40891 | -2.41350 |
| H  | 2.67178  | -4.36041 | -0.54124 | F | 1.74752  | 0.70928 | 2.32029  |
| C  | -1.43633 | -3.34997 | 1.16549  | F | 2.93541  | 3.13089 | 2.23570  |
| C  | 1.27176  | 0.74812  | -0.01513 | F | 3.11765  | 4.50088 | -0.12558 |
| C  | 3.18476  | -1.71817 | -1.34871 | C | -1.70414 | 0.28992 | 1.64914  |
| C  | 3.09327  | -2.29375 | 0.98844  |   |          |         |          |
| C  | -1.33001 | -0.12680 | 0.33450  |   |          |         |          |
| H  | 2.47919  | -2.68682 | 1.79955  |   |          |         |          |
| H  | 3.99591  | -2.91562 | 0.88707  |   |          |         |          |
| H  | 3.38416  | -1.27655 | 1.25199  |   |          |         |          |
| H  | 4.06419  | -2.35779 | -1.51754 |   |          |         |          |
| H  | 2.61224  | -1.63960 | -2.27461 |   |          |         |          |
| H  | 3.51971  | -0.72025 | -1.06347 |   |          |         |          |
| H  | -1.81372 | -4.38334 | 1.16676  |   |          |         |          |
| H  | -0.93149 | -3.14975 | 2.11235  |   |          |         |          |
| H  | -2.27358 | -2.65941 | 1.06619  |   |          |         |          |
| H  | -0.53518 | -3.21489 | -2.07796 |   |          |         |          |
| H  | -1.61359 | -4.38697 | -1.27212 |   |          |         |          |
| H  | -2.02492 | -2.64831 | -1.31137 |   |          |         |          |

|   |          |          |          |   |          |          |          |
|---|----------|----------|----------|---|----------|----------|----------|
| C | -2.23267 | 0.08932  | -0.69439 | H | -0.13161 | 4.26401  | 1.24470  |
| C | -3.51422 | 0.67151  | -0.46891 | C | 2.01031  | 3.12143  | -1.05864 |
| C | -4.44736 | 0.88533  | -1.52096 | H | -0.63124 | 3.90534  | -1.75620 |
| C | -3.88019 | 1.05736  | 0.86167  | H | -1.61943 | 4.88511  | -0.67294 |
| C | -5.68030 | 1.44747  | -1.27168 | C | 2.03025  | 3.03451  | 1.34358  |
| C | -5.15885 | 1.63537  | 1.08614  | C | -0.88137 | -0.83244 | 0.10190  |
| C | -6.04131 | 1.82655  | 0.04550  | C | -2.60518 | 2.39931  | -1.56095 |
| C | -2.93670 | 0.85260  | 1.90443  | C | -2.61120 | 2.96570  | 0.77529  |
| H | -1.97549 | -0.17604 | -1.71807 | C | 0.86430  | -0.67635 | 0.34065  |
| H | -0.99807 | 0.16916  | 2.46619  | H | -2.00523 | 3.21971  | 1.64610  |
| H | -3.19891 | 1.15941  | 2.91515  | H | -3.34789 | 3.76876  | 0.60847  |
| H | -4.16848 | 0.59839  | -2.53238 | H | -3.14322 | 2.03749  | 0.99291  |
| H | -5.42951 | 1.92765  | 2.09817  | H | -3.33744 | 3.18933  | -1.79466 |
| H | -6.38144 | 1.60505  | -2.08672 | H | -1.98066 | 2.22341  | -2.43911 |
| H | -7.01565 | 2.27029  | 0.22985  | H | -3.14533 | 1.47859  | -1.33013 |

## TS- $\beta$

### Parameters:

Zero-point correction = 0.407844

Thermal correction to Energy = 0.437117

Thermal correction to Enthalpy = 0.438061

Thermal correction to Gibbs Free Energy = 0.347833

Sum of electronic and zero-point Energies = -1588.776393

Sum of electronic and thermal Energies = -1588.747120

Sum of electronic and thermal Enthalpies = -1588.746176

Sum of electronic and thermal Free Energies = -1588.836404

Imaginary Frequency = 249.2575i

### Coordinates:

|    |          |         |          |   |          |          |          |
|----|----------|---------|----------|---|----------|----------|----------|
| C  | 0.21605  | 4.17962 | 0.21136  | H | 2.64573  | 3.94649  | 1.41564  |
| H  | 0.71461  | 5.13173 | -0.03544 | H | 1.41373  | 2.95248  | 2.24146  |
| C  | -0.97845 | 3.98964 | -0.72286 | H | 2.69184  | 2.16678  | 1.29965  |
| N  | 1.16789  | 3.04984 | 0.14894  | H | 1.39208  | 3.11532  | -1.95794 |
| N  | -1.75600 | 2.76784 | -0.41194 | H | 2.63161  | 4.03257  | -1.06273 |
| Pd | -0.18362 | 1.10266 | 0.03721  | H | 2.66409  | 2.24749  | -1.09250 |
|    |          |         |          | C | -1.68808 | -1.17266 | 1.21944  |
|    |          |         |          | C | -1.34713 | -1.42852 | -1.09939 |
|    |          |         |          | C | -2.41421 | -2.30855 | -1.17757 |
|    |          |         |          | C | -2.76116 | -2.05039 | 1.17646  |
|    |          |         |          | C | -3.12986 | -2.64213 | -0.02874 |
|    |          |         |          | F | -0.73736 | -1.12961 | -2.27578 |
|    |          |         |          | F | -2.78542 | -2.82715 | -2.36252 |
|    |          |         |          | F | -1.44561 | -0.59728 | 2.42888  |
|    |          |         |          | F | -3.47328 | -2.31063 | 2.28825  |
|    |          |         |          | F | -4.16381 | -3.49727 | -0.08798 |
|    |          |         |          | C | 1.36978  | -0.90255 | 1.67270  |
|    |          |         |          | C | 1.72265  | -0.99631 | -0.72307 |
|    |          |         |          | C | 3.03646  | -1.48864 | -0.51763 |
|    |          |         |          | C | 3.90286  | -1.79689 | -1.60559 |
|    |          |         |          | C | 3.51960  | -1.68110 | 0.81825  |

|   |         |          |          |   |          |          |          |
|---|---------|----------|----------|---|----------|----------|----------|
| C | 5.17845 | -2.26764 | -1.38224 | C | -1.70125 | -0.92333 | 0.24790  |
| C | 4.83585 | -2.16981 | 1.01555  | C | -1.19256 | 3.25327  | 0.13716  |
| C | 5.65151 | -2.45731 | -0.05974 | C | 0.52588  | 3.11502  | 1.82340  |
| C | 2.64006 | -1.37295 | 1.89445  | C | -0.23263 | -1.02051 | 0.58501  |
| H | 1.38076 | -0.88588 | -1.74426 | H | 1.57170  | 2.85323  | 2.03007  |
| H | 0.72722 | -0.70120 | 2.51936  | H | 0.34731  | 4.16787  | 2.12715  |
| H | 2.99078 | -1.51905 | 2.91387  | H | -0.11326 | 2.44965  | 2.41712  |
| H | 3.53825 | -1.65480 | -2.62010 | H | -1.39169 | 4.32516  | 0.343748 |
| H | 5.19375 | -2.31473 | 2.03209  | H | -1.43727 | 3.03822  | -0.91200 |
| H | 5.82748 | -2.49844 | -2.22235 | H | -1.83199 | 2.64365  | 0.784607 |
| H | 6.65852 | -2.83027 | 0.10330  | H | 4.61598  | 1.66208  | -1.37778 |

## Int2- $\beta$

### Parameters:

Zero-point correction = 0.409035

Thermal correction to Energy = 0.438673

Thermal correction to Enthalpy = 0.439617

Thermal correction to Gibbs Free Energy = 0.348473

Sum of electronic and zero-point Energies = -1588.792705

Sum of electronic and thermal Energies = -1588.763067

Sum of electronic and thermal Enthalpies = -1588.762122

Sum of electronic and thermal Free Energies = -1588.853266

### Coordinates:

|    |         |         |          |   |          |          |          |
|----|---------|---------|----------|---|----------|----------|----------|
| C  | 2.49831 | 3.17957 | -0.59915 | C | -2.5711  | -0.08681 | 0.97623  |
| H  | 3.12512 | 3.86919 | -1.20211 | C | -2.31921 | -1.66735 | -0.77794 |
| C  | 1.09134 | 3.75330 | -0.46596 | C | -3.67504 | -1.53714 | -1.10043 |
| N  | 2.48289 | 1.82055 | -1.18961 | C | -3.92562 | 0.06364  | 0.67980  |
| N  | 0.22256 | 2.90983 | 0.39091  | C | -4.49132 | -0.67169 | -0.36772 |
| Pd | 0.75709 | 0.71133 | -0.14103 | F | -1.61363 | -2.56254 | -1.50948 |
| H  | 2.96725 | 3.09962 | 0.39363  | F | -4.20487 | -2.27248 | -2.09783 |
| C  | 2.25611 | 1.86730 | -2.64844 | F | -2.08251 | 0.68430  | 1.98828  |
| H  | 0.61595 | 3.81223 | -1.45722 | F | -4.68644 | 0.91878  | 1.39286  |
| H  | 1.14768 | 4.78926 | -0.07192 | F | -5.79788 | -0.54346 | -0.66576 |
| C  | 3.75980 | 1.13087 | -0.91377 | C | 0.14878  | -1.20745 | 1.97971  |
|    |         |         |          | C | 0.76700  | -1.36391 | -0.42074 |
|    |         |         |          | C | 2.00604  | -2.02033 | -0.02728 |
|    |         |         |          | C | 2.91350  | -2.52128 | -0.99075 |
|    |         |         |          | C | 2.32010  | -2.18076 | 1.36139  |
|    |         |         |          | C | 4.11315  | -3.12100 | -0.61107 |
|    |         |         |          | C | 3.54489  | -2.79120 | 1.72314  |
|    |         |         |          | C | 4.43550  | -3.24977 | 0.75575  |
|    |         |         |          | C | 1.36027  | -1.74197 | 2.33970  |
|    |         |         |          | H | 0.44375  | -1.54875 | -1.44932 |

|   |          |          |          |
|---|----------|----------|----------|
| H | -0.57167 | -0.93775 | 2.75411  |
| H | 1.60427  | -1.86738 | 3.39870  |
| H | 2.65696  | -2.42651 | -2.05111 |
| H | 3.77815  | -2.90843 | 2.78595  |
| H | 4.80119  | -3.49571 | -1.37300 |
| H | 5.37543  | -3.71978 | 1.05469  |

### Int1\_1-pyr

#### Parameters:

Zero-point correction = 0.469863

Thermal correction to Energy = 0.502293

Thermal correction to Enthalpy = 0.503237

Thermal correction to Gibbs Free Energy = 0.407374

Sum of electronic and zero-point Energies = -1818.682951

Sum of electronic and thermal Energies = -1818.650521

Sum of electronic and thermal Enthalpies = -1818.649577

Sum of electronic and thermal Free Energies = -1818.745440

#### Coordinates:

|    |          |          |          |
|----|----------|----------|----------|
| C  | -1.78407 | -3.89950 | -0.61042 |
| H  | -1.82170 | -4.97045 | -0.36188 |
| C  | -3.15626 | -3.27706 | -0.39132 |
| N  | -0.72541 | -3.22100 | 0.18872  |
| N  | -3.17066 | -1.83172 | -0.74057 |
| Pd | -1.20789 | -1.03803 | 0.06897  |
| H  | -1.49931 | -3.82500 | -1.66281 |
| C  | -0.79161 | -3.63767 | 1.61076  |
| H  | -3.44747 | -3.36622 | 0.65827  |
| H  | -3.90573 | -3.82558 | -0.98171 |
| C  | 0.60403  | -3.58951 | -0.35151 |
| C  | -1.75084 | 0.91508  | 0.02786  |
| C  | -4.35986 | -1.18790 | -0.13963 |
| C  | -3.21401 | -1.64363 | -2.20955 |
| C  | 0.57533  | -0.44592 | 0.80733  |
| H  | -2.35278 | -2.11999 | -2.67957 |

|   |          |          |          |
|---|----------|----------|----------|
| H | -4.13476 | -2.07381 | -2.63097 |
| H | -3.17423 | -0.57847 | -2.43657 |
| H | -5.28685 | -1.65278 | -0.50593 |
| H | -4.31684 | -1.27969 | 0.94716  |
| H | -4.36573 | -0.12907 | -0.40041 |
| H | 0.75223  | -4.67817 | -0.30990 |
| H | 0.68542  | -3.25414 | -1.38657 |
| H | 1.37997  | -3.09786 | 0.23473  |
| H | -1.76056 | -3.37916 | 2.03959  |
| H | -0.63454 | -4.72221 | 1.70459  |
| H | -0.01747 | -3.11133 | 2.17010  |
| C | 1.70715  | -0.19298 | -0.01145 |
| C | 0.73782  | -0.36135 | 2.20156  |
| C | 2.98157  | 0.09168  | 0.58464  |
| C | 1.63854  | -0.21875 | -1.45063 |
| C | 1.97049  | -0.07913 | 2.79117  |
| C | 3.11149  | 0.14527  | 2.00633  |
| C | 4.13088  | 0.32338  | -0.23544 |
| C | 2.73130  | 0.00394  | -2.23407 |
| C | 4.01944  | 0.27808  | -1.65987 |
| H | -0.12175 | -0.51150 | 2.84818  |
| H | 0.66970  | -0.40582 | -1.90227 |
| H | 2.05417  | -0.02771 | 3.87478  |
| H | 2.64297  | -0.01563 | -3.31765 |
| C | -1.72613 | 1.69525  | -1.12313 |
| C | -2.22910 | 1.56214  | 1.16376  |
| C | -2.64668 | 2.89087  | 1.17830  |
| C | -2.13217 | 3.02797  | -1.16362 |
| C | -2.59414 | 3.63241  | 0.00131  |
| F | -2.32531 | 0.88887  | 2.34289  |
| F | -3.10599 | 3.46491  | 2.30583  |
| F | -1.30358 | 1.16163  | -2.30358 |
| F | -2.08939 | 3.73425  | -2.30857 |
| F | -2.99458 | 4.91484  | -0.01147 |
| C | 4.39762  | 0.42987  | 2.58066  |
| C | 5.49184  | 0.64681  | 1.79906  |



|   |         |         |          |   |          |          |          |
|---|---------|---------|----------|---|----------|----------|----------|
| H | 4.47963 | 0.46913 | 3.66419  | C | 4.13310  | 1.65931  | -0.60621 |
| H | 6.45818 | 0.86051 | 2.24862  | C | 2.61689  | 2.23024  | -2.38297 |
| C | 5.16195 | 0.50641 | -2.44612 | C | -0.26420 | -0.47012 | 0.73304  |
| C | 6.39409 | 0.77415 | -1.85125 | H | 1.63622  | 2.63339  | -2.64020 |
| H | 5.07357 | 0.47311 | -3.52900 | H | 3.38995  | 2.82927  | -2.89113 |
| H | 7.26700 | 0.94835 | -2.47420 | H | 2.67000  | 1.20301  | -2.74981 |
| C | 6.51490 | 0.82181 | -0.46276 | H | 4.94839  | 2.24199  | -1.06436 |
| C | 5.40034 | 0.60143 | 0.36461  | H | 4.27930  | 1.63876  | 0.47571  |
| H | 7.47834 | 1.03255 | -0.00577 | H | 4.18061  | 0.63536  | -0.98347 |

### TS\_1-pyr

#### Parameters:

Zero-point correction = 0.466993

Thermal correction to Energy = 0.499423

Thermal correction to Enthalpy = 0.500367

Thermal correction to Gibbs Free Energy = 0.404618

Sum of electronic and zero-point Energies = -1818.639634

Sum of electronic and thermal Energies = -1818.607203

Sum of electronic and thermal Enthalpies = -1818.606259

Sum of electronic and thermal Free Energies = -1818.702009

Imaginary frequency = 128.4311i

#### Coordinates:

|    |          |          |          |   |          |          |          |
|----|----------|----------|----------|---|----------|----------|----------|
| C  | 1.27257  | 4.10332  | -0.26709 | H | 0.44440  | -0.88623 | 2.73958  |
| H  | 1.27969  | 5.14786  | 0.08520  | H | -0.53832 | 0.39014  | -1.86208 |
| C  | 2.71453  | 3.61013  | -0.37357 | H | -1.72547 | -1.28554 | 3.74344  |
| N  | 0.44161  | 3.25500  | 0.61649  | H | -2.59106 | 0.64981  | -3.15124 |
| N  | 2.81113  | 2.23549  | -0.91886 | C | 1.20313  | -1.93315 | -1.00291 |
| Pd | 1.07448  | 1.02819  | 0.09507  | C | 2.27962  | -1.37663 | 1.01870  |
| H  | 0.80650  | 4.10599  | -1.25613 | C | 3.19671  | -2.39534 | 0.83531  |
| C  | 0.73970  | 3.50966  | 2.03902  | C | 2.10543  | -2.96956 | -1.20657 |
| H  | 3.18057  | 3.60697  | 0.61530  | C | 3.11434  | -3.21989 | -0.28529 |
| H  | 3.28826  | 4.31710  | -0.99430 | F | 2.48411  | -0.62290 | 2.13662  |
| C  | -0.98853 | 3.51086  | 0.36918  | F | 4.19581  | -2.57732 | 1.71772  |
| C  | 1.21005  | -1.06229 | 0.12209  | F | 0.27223  | -1.79795 | -1.97303 |

|   |          |          |          |   |          |          |          |
|---|----------|----------|----------|---|----------|----------|----------|
| F | 2.00503  | -3.73837 | -2.30582 | H | -2.07705 | 4.57655  | -1.55599 |
| F | 3.98909  | -4.22006 | -0.47042 | C | 1.08775  | 3.69708  | 1.59551  |
| C | -4.13307 | -1.24647 | 2.50555  | C | 2.06122  | -0.93185 | 0.36821  |
| C | -5.27798 | -1.14856 | 1.76939  | C | -2.15923 | 1.92123  | -2.50689 |
| H | -4.17510 | -1.53867 | 3.55179  | C | -3.04612 | 2.49428  | -0.34800 |
| H | -6.24404 | -1.36554 | 2.21725  | C | 0.69287  | -0.54448 | 0.85029  |
| C | -5.11309 | 0.10893  | -2.29464 | H | -2.82667 | 2.90453  | 0.63898  |
| C | -6.34110 | -0.18820 | -1.70556 | H | -3.84845 | 3.09408  | -0.80992 |
| H | -5.06775 | 0.44370  | -3.32757 | H | -3.39889 | 1.46973  | -0.21674 |
| H | -7.25527 | -0.08822 | -2.28388 | H | -2.91830 | 2.52591  | -3.03073 |
| C | -6.40518 | -0.60582 | -0.37702 | H | -1.25720 | 1.87763  | -3.12142 |
| C | -5.23569 | -0.74088 | 0.39390  | H | -2.54077 | 0.90611  | -2.38424 |
| H | -7.36571 | -0.82812 | 0.08011  | H | 1.38378  | 4.74994  | 1.73793  |

### Int2\_1-pyr

#### Parameters:

Zero-point correction = 0.469235 (Hartree/Particle)

Thermal correction to Energy = 0.501890

Thermal correction to Enthalpy = 0.502834

Thermal correction to Gibbs Free Energy = 0.406646

Sum of electronic and zero-point Energies = -1818.665795

Sum of electronic and thermal Energies = -1818.633140

Sum of electronic and thermal Enthalpies = -1818.632196

Sum of electronic and thermal Free Energies = -1818.728384

#### Coordinates:

|    |          |         |          |   |          |          |          |
|----|----------|---------|----------|---|----------|----------|----------|
| C  | -0.50985 | 4.30828 | -0.10351 | H | 1.43930  | -0.18161 | 2.86307  |
| H  | -0.18573 | 5.35220 | -0.25160 | H | 0.48455  | -1.18123 | -1.84196 |
| C  | -1.27784 | 3.84795 | -1.33932 | H | -0.70669 | -0.48189 | 4.00411  |
| N  | 0.64750  | 3.44180 | 0.21075  | H | -1.48827 | -1.99580 | -3.03240 |
| N  | -1.83220 | 2.48686 | -1.18625 | C | 2.34188  | -2.22630 | -0.09707 |
| Pd | -0.16427 | 1.21128 | -0.05998 | C | 3.16805  | -0.07796 | 0.45023  |
| H  | -1.17269 | 4.30345 | 0.76625  | C | 4.44600  | -0.44474 | 0.04183  |
| C  | 1.76945  | 3.70468 | -0.71149 | C | 3.60892  | -2.62017 | -0.52094 |
| H  | -0.61399 | 3.84129 | -2.20830 | C | 4.67128  | -1.72593 | -0.45139 |

|   |          |          |          |   |          |          |          |
|---|----------|----------|----------|---|----------|----------|----------|
| F | 3.02637  | 1.17320  | 0.93508  | H | 2.64541  | -3.65657 | 1.61708  |
| F | 5.46060  | 0.42840  | 0.12591  | C | 0.76139  | -3.73335 | -1.15213 |
| F | 1.37582  | -3.16073 | -0.13325 | H | 3.55413  | -3.19624 | -1.27290 |
| F | 3.81474  | -3.86716 | -0.96794 | H | 4.62449  | -3.54260 | 0.08638  |
| F | 5.89567  | -2.09385 | -0.84741 | C | 0.19976  | -3.60537 | 1.18685  |
| C | -3.05832 | -1.23223 | 2.88185  | C | 1.86413  | 0.99046  | -0.07331 |
| C | -4.17395 | -1.64205 | 2.20215  | C | 4.52771  | -0.92668 | -0.91448 |
| H | -3.10007 | -1.08092 | 3.95807  | C | 4.25173  | -1.34896 | 1.44036  |
| H | -5.10942 | -1.81224 | 2.72887  | C | -0.44401 | -0.54664 | 0.01956  |
| C | -3.95725 | -2.38900 | -1.97756 | H | 3.65200  | -1.84033 | 2.20725  |
| C | -5.16437 | -2.58311 | -1.29366 | H | 5.28972  | -1.70668 | 1.51197  |
| H | -3.89503 | -2.60165 | -3.04181 | H | 4.22774  | -0.27540 | 1.62958  |
| H | -6.03679 | -2.93833 | -1.83537 | H | 5.55829  | -1.31096 | -0.90331 |
| C | -5.25105 | -2.33647 | 0.06940  | H | 4.09903  | -1.07346 | -1.90735 |
| C | -4.12755 | -1.87824 | 0.79303  | H | 4.54451  | 0.14171  | -0.69608 |
| H | -6.18616 | -2.50003 | 0.59877  | H | 0.12330  | -4.69995 | 1.25780  |

## Int1\_2-pyr

### Parameters:

Zero-point correction = 0.469431

Thermal correction to Energy = 0.502058

Thermal correction to Enthalpy = 0.503002

Thermal correction to Gibbs Free Energy = 0.405977

Sum of electronic and zero-point Energies = -1818.684934

Sum of electronic and thermal Energies = -1818.652307

Sum of electronic and thermal Enthalpies = -1818.651362

Sum of electronic and thermal Free Energies = -1818.748387

### Coordinates:

|    |         |          |          |   |          |          |          |
|----|---------|----------|----------|---|----------|----------|----------|
| C  | 2.52895 | -3.77438 | 0.53703  | F | 2.66543  | 5.09225  | -0.30577 |
| H  | 2.56145 | -4.85331 | 0.32556  | C | -1.11183 | -0.14031 | 1.18723  |
| C  | 3.66791 | -3.07514 | -0.19252 | C | -1.20205 | -0.69114 | -1.15442 |
| N  | 1.19910 | -3.21400 | 0.16523  | C | -2.59345 | -0.47657 | -1.18048 |
| N  | 3.69411 | -1.61672 | 0.09463  | C | -3.37741 | -0.63519 | -2.37701 |
| Pd | 1.51571 | -1.00034 | 0.04142  | C | -3.26047 | -0.08882 | 0.01975  |

|   |          |          |          |    |          |          |          |
|---|----------|----------|----------|----|----------|----------|----------|
| C | -4.72478 | -0.42916 | -2.37694 | C  | -3.20766 | -3.48715 | 0.35362  |
| C | -4.66962 | 0.13168  | 0.02227  | N  | -0.74318 | -3.30888 | -0.03294 |
| C | -5.42280 | -0.03905 | -1.18053 | N  | -3.46857 | -2.07144 | 0.00548  |
| C | -2.50091 | 0.08328  | 1.21588  | Pd | -1.38027 | -1.01938 | -0.01298 |
| H | -0.71541 | -0.97273 | -2.08588 | H  | -2.12245 | -3.99692 | -1.44234 |
| H | -0.55014 | 0.01848  | 2.10476  | C  | -0.23117 | -3.67551 | 1.30009  |
| H | -2.86756 | -0.92604 | -3.29240 | H  | -3.06444 | -3.53972 | 1.43626  |
| H | -5.29979 | -0.55490 | -3.29100 | H  | -4.08138 | -4.11590 | 0.11567  |
| C | -3.19317 | 0.48603  | 2.41208  | C  | 0.29702  | -3.57249 | -1.04237 |
| C | -4.53993 | 0.69491  | 2.41829  | C  | -1.38366 | 1.03975  | 0.00399  |
| H | -2.61307 | 0.62162  | 3.32170  | C  | -4.36235 | -1.45787 | 1.00622  |
| H | -5.04454 | 0.99815  | 3.33225  | C  | -4.08798 | -1.95514 | -1.32973 |
| C | -6.81034 | 0.18148  | -1.15261 | C  | 0.22618  | 0.31858  | -0.00544 |
| C | -7.44777 | 0.56304  | 0.02806  | H  | -3.43528 | -2.38029 | -2.09344 |
| H | -7.38560 | 0.05265  | -2.06585 | H  | -5.06084 | -2.47259 | -1.36562 |
| H | -8.52122 | 0.72976  | 0.03039  | H  | -4.24055 | -0.89986 | -1.56442 |
| C | -6.71927 | 0.73463  | 1.20547  | H  | -5.34293 | -1.96028 | 1.03712  |
| C | -5.33001 | 0.52555  | 1.22727  | H  | -3.90306 | -1.51568 | 1.99512  |
| H | -7.22421 | 1.03454  | 2.12014  | H  | -4.51556 | -0.40573 | 0.75664  |

## TS\_2-pyr

### Parameters:

Zero-point correction = 0.467171

Thermal correction to Energy = 0.499741

Thermal correction to Enthalpy = 0.500686

Thermal correction to Gibbs Free Energy = 0.403851

Sum of electronic and zero-point Energies = -1818.644433

Sum of electronic and thermal Energies = -1818.611863

Sum of electronic and thermal Enthalpies = -1818.610919

Sum of electronic and thermal Free Energies = -1818.707753

Imaginary frequency = 237.8934i

### Coordinates:

|   |          |          |          |   |          |         |          |
|---|----------|----------|----------|---|----------|---------|----------|
| C | -1.97942 | -4.05131 | -0.35958 | F | -3.62792 | 4.62861 | 0.02824  |
| H | -1.87820 | -5.11954 | -0.10520 | C | 0.97018  | 0.36536 | -1.21408 |

|    |          |          |          |   |          |         |          |
|----|----------|----------|----------|---|----------|---------|----------|
| C  | -3.20766 | -3.48715 | 0.35362  | F | -1.56798 | 1.12674 | 2.39879  |
| N  | -0.74318 | -3.30888 | -0.03294 | F | -2.94348 | 3.40132 | 2.38491  |
| N  | -3.46857 | -2.07144 | 0.00548  | F | -1.58391 | 1.14946 | -2.38952 |
| Pd | -1.38027 | -1.01938 | -0.01298 | F | -2.95936 | 3.42371 | -2.34438 |
| H  | -2.12245 | -3.99692 | -1.44234 | F | -3.62792 | 4.62861 | 0.02824  |
| C  | -0.23117 | -3.67551 | 1.30009  | C | 0.97018  | 0.36536 | -1.21408 |
| H  | -3.06444 | -3.53972 | 1.43626  |   |          |         |          |
| H  | -4.08138 | -4.11590 | 0.11567  |   |          |         |          |
| C  | 0.29702  | -3.57249 | -1.04237 |   |          |         |          |
| C  | -1.38366 | 1.03975  | 0.00399  |   |          |         |          |
| C  | -4.36235 | -1.45787 | 1.00622  |   |          |         |          |
| C  | -4.08798 | -1.95514 | -1.32973 |   |          |         |          |
| C  | 0.22618  | 0.31858  | -0.00544 |   |          |         |          |
| H  | -3.43528 | -2.38029 | -2.09344 |   |          |         |          |
| H  | -5.06084 | -2.47259 | -1.36562 |   |          |         |          |
| H  | -4.24055 | -0.89986 | -1.56442 |   |          |         |          |
| H  | -5.34293 | -1.96028 | 1.03712  |   |          |         |          |
| H  | -3.90306 | -1.51568 | 1.99512  |   |          |         |          |
| H  | -4.51556 | -0.40573 | 0.75664  |   |          |         |          |
| H  | 0.57620  | -4.63869 | -1.07282 |   |          |         |          |
| H  | -0.06314 | -3.27338 | -2.02922 |   |          |         |          |
| H  | 1.18597  | -2.98356 | -0.80701 |   |          |         |          |
| H  | -0.97786 | -3.46691 | 2.06816  |   |          |         |          |
| H  | 0.03758  | -4.74402 | 1.34867  |   |          |         |          |
| H  | 0.65585  | -3.07797 | 1.52052  |   |          |         |          |
| C  | -1.83879 | 1.69568  | -1.17028 |   |          |         |          |
| C  | -1.83070 | 1.68466  | 1.18708  |   |          |         |          |
| C  | -2.55954 | 2.86352  | 1.21283  |   |          |         |          |
| C  | -2.56743 | 2.87483  | -1.18006 |   |          |         |          |
| C  | -2.92624 | 3.48363  | 0.02052  |   |          |         |          |

|   |         |         |          |              |          |          |          |
|---|---------|---------|----------|--------------|----------|----------|----------|
| C | 0.96539 | 0.31235 | 1.20733  | Coordinates: |          |          |          |
| C | 2.36600 | 0.31828 | 1.22954  | C            | -1.22795 | 4.14247  | 0.41045  |
| C | 3.11156 | 0.29287 | 2.46262  | H            | -1.45177 | 4.99614  | 1.07192  |
| C | 3.09306 | 0.34891 | 0.00117  | C            | 0.20728  | 4.26944  | -0.09290 |
| C | 4.47389 | 0.29592 | 2.46815  | N            | -1.48431 | 2.86093  | 1.10443  |
| C | 4.51663 | 0.35486 | 0.00406  | N            | 0.56381  | 3.21564  | -1.06759 |
| C | 5.22953 | 0.32735 | 1.24318  | Pd           | -0.31838 | 1.21846  | -0.17548 |
| C | 2.37055 | 0.37558 | -1.23025 | H            | -1.92179 | 4.20691  | -0.43238 |
| H | 0.43964 | 0.31598 | 2.15324  | C            | -0.92983 | 2.87540  | 2.47185  |
| H | 0.44802 | 0.40758 | -2.16111 | H            | 0.90286  | 4.19126  | 0.74699  |
| H | 2.55882 | 0.27223 | 3.39853  | H            | 0.34562  | 5.27215  | -0.53129 |
| H | 5.01852 | 0.27728 | 3.40874  | C            | -2.93814 | 2.62115  | 1.17372  |
| C | 3.12108 | 0.40992 | -2.46021 | C            | -1.86931 | -1.34064 | -0.06147 |
| C | 4.48335 | 0.41494 | -2.46019 | C            | 2.02937  | 3.12937  | -1.20426 |
| H | 2.57203 | 0.43334 | -3.39820 | C            | -0.03229 | 3.48315  | -2.38976 |
| H | 5.03164 | 0.44214 | -3.39845 | C            | -0.43989 | -0.92736 | 0.07432  |
| C | 6.63389 | 0.33263 | 1.22031  | H            | -1.12068 | 3.51334  | -2.32065 |
| C | 7.32710 | 0.36491 | 0.00977  | H            | 0.32385  | 4.44076  | -2.80549 |
| H | 7.17932 | 0.31224 | 2.16021  | H            | 0.24129  | 2.67923  | -3.07602 |
| H | 8.41329 | 0.36943 | 0.01196  | H            | 2.45696  | 4.07147  | -1.58585 |
| C | 6.63851 | 0.39207 | -1.20360 | H            | 2.47623  | 2.90559  | -0.23341 |
| C | 5.23432 | 0.38755 | -1.23216 | H            | 2.28449  | 2.32113  | -1.89208 |
| H | 7.18760 | 0.41770 | -2.14125 | H            | -3.45777 | 3.43090  | 1.71276  |

## Int2\_2-pyr

### Parameters:

Zero-point correction = 0.469380

Thermal correction to Energy = 0.502032

Thermal correction to Enthalpy = 0.502976

Thermal correction to Gibbs Free Energy = 0.406124

Sum of electronic and zero-point Energies = -1818.673542

Sum of electronic and thermal Energies = -1818.640890

Sum of electronic and thermal Enthalpies = -1818.639946

Sum of electronic and thermal Free Energies = -1818.736798

|   |          |          |          |
|---|----------|----------|----------|
| H | -3.34726 | 2.55362  | 0.16296  |
| H | -3.12510 | 1.68084  | 1.69197  |
| H | 0.15175  | 3.01746  | 2.44364  |
| H | -1.37833 | 3.67946  | 3.07962  |
| H | -1.13238 | 1.91569  | 2.95067  |
| C | -2.80161 | -1.13982 | 0.97082  |
| C | -2.38212 | -1.99348 | -1.19508 |
| C | -3.71949 | -2.36521 | -1.31578 |
| C | -4.13872 | -1.50273 | 0.87822  |
| C | -4.60830 | -2.12469 | -0.27502 |
| F | -1.58303 | -2.30391 | -2.23501 |
| F | -4.14662 | -2.98180 | -2.42740 |
| F | -2.42380 | -0.51934 | 2.11171  |

|   |          |          |          |
|---|----------|----------|----------|
| F | -4.97868 | -1.24948 | 1.89299  |
| F | -5.89447 | -2.48353 | -0.37907 |
| C | 0.26259  | -1.29705 | 1.27455  |
| C | 0.36859  | -0.55830 | -1.08019 |
| C | 1.80284  | -0.73783 | -1.04278 |
| C | 2.60285  | -0.55309 | -2.21045 |
| C | 2.44062  | -1.11705 | 0.16092  |
| C | 3.96669  | -0.69428 | -2.17671 |
| C | 3.85832  | -1.26602 | 0.20923  |
| C | 4.64202  | -1.04512 | -0.96683 |
| C | 1.64529  | -1.37630 | 1.33940  |
| H | -0.08181 | -0.58177 | -2.06830 |
| H | -0.31173 | -1.56097 | 2.15655  |
| H | 2.10624  | -0.29321 | -3.14268 |
| H | 4.55601  | -0.54507 | -3.07799 |
| C | 2.33044  | -1.75056 | 2.55266  |
| C | 3.68376  | -1.87171 | 2.60033  |
| H | 1.73206  | -1.93998 | 3.44089  |
| H | 4.17808  | -2.15582 | 3.52587  |
| C | 6.04592  | -1.19418 | -0.89359 |
| C | 6.65828  | -1.55067 | 0.29934  |
| H | 6.64096  | -1.02762 | -1.78789 |
| H | 7.73834  | -1.66128 | 0.34053  |
| C | 5.89554  | -1.77378 | 1.45497  |
| C | 4.50327  | -1.64049 | 1.43276  |
| H | 6.38630  | -2.05645 | 2.38284  |

- (1) Gaussian 09, Revision D.01, M. J. Frisch, G. W. Trucks, H. B. Schlegel, G. E. Scuseria, M. A. Robb, J. R. Cheeseman, G. Scalmani, V. Barone, B. Mennucci, G. A. Petersson, H. Nakatsuji, M. Caricato, X. Li, H. P. Hratchian, A. F. Izmaylov, J. Bloino, G. Zheng, J. L. Sonnenberg, M. Hada, M. Ehara, K. Toyota, R. Fukuda, J. Hasegawa, M. Ishida, T. Nakajima, Y. Honda, O. Kitao, H. Nakai, T. Vreven, J. A. Montgomery, Jr., J. E. Peralta, F. Ogliaro, M. Bearpark, J. J. Heyd, E. Brothers, K. N. Kudin, V. N. Staroverov, R. Kobayashi, J. Normand, K. Raghavachari, A. Rendell, J. C. Burant, S. S. Iyengar, J. Tomasi, M. Cossi, N. Rega, J. M. Millam, M. Klene, J. E. Knox, J. B. Cross, V. Bakken, C. Adamo, J. Jaramillo, R. Gomperts, R. E. Stratmann, O. Yazyev, A. J. Austin, R. Cammi, C. Pomelli, J. W. Ochterski, R. L. Martin, K. Morokuma, V. G. Zakrzewski, G. A. Voth, P. Salvador, J. J. Dannenberg, S. Dapprich, A. D. Daniels, Ö. Farkas, J. B. Foresman, J. V. Ortiz, J. Cioslowski, and D. J. Fox, Gaussian, Inc., Wallingford CT, 2009.
- (2) Gaussian 16, Revision B.01, M. J. Frisch, G. W. Trucks, H. B. Schlegel, G. E. Scuseria, M. A. Robb; J. R. Cheeseman; G. Scalmani, V. Barone, G. A. Petersson, H. Nakatsuji, X. Li, M. Caricato, A. V. Marenich, J. Bloino, B. G. Janesko, R. Gomperts, B. Mennucci, H. P. Hratchian, J. V. Ortiz, A. F. Izmaylov, J. L. Sonnenberg, D. Williams-Young, F. Ding, F. Lipparini, F. Egidi, J. Goings, B. Peng, A. Petrone, T. Henderson, D. Ranasinghe, V. G. Zakrzewski, J. Gao, N. Rega, G. Zheng, W. Liang, M. Hada, M. Ehara, K. Toyota, R. Fukuda, J. Hasegawa, M. Ishida, T. Nakajima, Y. Honda, O. Kitao, H. Nakai, T. Vreven, K. Throssell, J. A. Montgomery Jr., J. E. Peralta, F. Ogliaro, M. J. Bearpark, J. J. Heyd, E. N. Brothers, K. N. Kudin, V. N. Staroverov, T. A. Keith, R. Kobayashi, J. Normand, K. Raghavachari, A. P. Rendell, J. C. Burant, S. S. Iyengar, J. Tomasi, M. Cossi, J. M. Millam, M. Klene, C. Adamo, R. Cammi, J. W. Ochterski, R. L. Martin, K. Morokuma, O. Farkas, J. B. Foresman, D. J. Fox, Gaussian, Inc., Wallingford CT, 2016.
- (3) B3LYP: (a) K. Kim, K. D. Jordan, *J. Phys. Chem.* **1994**, *98*, 10089–10094; (b) P. J. Stephens, F. J. Devlin, C. F. Chabalowski, M. J. Frisch, *J. Phys. Chem.* **1994**, *98*, 11623–11627; (c) D. Becke, *J. Chem. Phys.* **1993**, *98*, 5648–5652; (d) C. Lee, W. Yang, R. G. Parr, *Phys. Rev. B.* **1988**, *37*, 785–789; (e) H. Vosko, L. Wilk, M. Nusair, *Can. J. Phys.* **1980**, *58*, 1200–1211.
- (4) SDD: (a) T. H. Dunning Jr. and P. J. Hay, in *Modern Theoretical Chemistry*, Ed. H. F. Schaefer III, Vol. 3 (Plenum, New York, 1977) 1-28; (b) D. Andrae, U. Häußermann, M. Dolg, H. Stoll, H. Preuß, *Theor. Chim. Acta* **1990**, *77*, 123–141.
- (5) IRC: Fukui, K. *Acc. Chem. Res.* **1981**, *14*, 363-368.

- (6) 6-31G, 6-311G: (a) R. Ditchfield, W. J. Hehre, J. A. Pople, *J. Chem. Phys.* **1971**, *54*, 724-728; (b) W. J. Hehre, R. Ditchfield, J. A. Pople, *J. Chem. Phys.* **1972**, *56*, 2257-2260.
- (7) IEF-PCM: (a) M. T. Cancès, B. Mennucci, J. Tomasi, *J. Chem. Phys.* **1997**, *107*, 3032; (b) B. Mennucci, J. Tomasi, *J. Chem. Phys.* **1997**, *106*, 5151; (c) B. Mennucci, E. Cancès, J. Tomasi, *J. Phys. Chem. B* **1997**, *101*, 10506; (d) J. Tomasi, B. Mennucci, E. Cancès, *J. Mol. Struct. (Theochem)* **1999**, *464*, 211.
